# Supplementary material for: 5'-Chloro-5'-deoxy-(±)-ENBA, a Potent and Selective Adenosine A1 Receptor Agonist, Alleviates Neuropathic Pain in Mice Through Functional Glial and Microglial Changes without Affecting Motor or Cardiovascular Functions
Source: PubMed Central journal article supplement (PMC6268894; doi:10.3390/molecules171213712), 2012-11-22
Supplement: molecules-17-13712-s001.pdf [file molecules-17-13712-s001.pdf]

# Supplementanr Material

**Figure 1.** Sequence alignment of the human (ADORA1-1) and murine (Adora1-1) A<sub>1</sub>ARs. The sequence alignment was performed with the program MultiAlign.

```

1                                                                                               130
ADORA1-1  MPPSISAFQAAYIGIEVLIALVSPGNVLIWAVKVNQALRDATFCFIVSLAVADVAVGALVIPLAILINIGPQTYFHTCLMVACPVLIILTQSSILALLAIAVDRYLRVKIPLRYKMVVTPRRAAVAIAAG
Adora1-1  MPPYISAFQAAYIGIEVLIALVSPGNVLIWAVKVNQALRDATFCFIVSLAVADVAVGALVIPLAILINIGPQTYFHTCLMVACPVLIILTQSSILALLAIAVDRYLRVKIPLRYKTVVTQRRAAVAIAAG
Consensus MPPsISAFQAAYIGIEVLIALVSPGNVLIWAVKVNQALRDATFCFIVSLAVADVAVGALVIPLAILINIGPQTYFHTCLMVACPVLIILTQSSILALLAIAVDRYLRVKIPLRYKmVVTqRRAAVAIAAG

131                                                                                               260
ADORA1-1  CWILSFVVGLTPMFGWNNLSAVERAWAANGSMGEPVIKCEFEKVISMEYMVYFNFFVWVLPPLLLMVLIIYLEV FYLIRKQLNKKVSASSGDPQKYYGKELKIAKSLALILFLFALSWLPLHILNCITLFC
Adora1-1  CWILSLVVGLTPMFGWNNLSEVEQAWIANGSVGEPVIKCEFEKVISMEYMVYFNFFVWVLPPLLLMVLIIYLEV FYLIRKQLNKKVSASSGDPQKYYGKELKIAKSLALILFLFALSWLPLHILNCITLFC
Consensus CWILSlVVGLTPMFGWNNLSaVErAWaANGSmGEPVIKCEFEKVISMEYMVYFNFFVWVLPPLLLMVLIIYLEV FYLIRKQLNKKVSASSGDPQKYYGKELKIAKSLALILFLFALSWLPLHILNCITLFC

261                                                                                               326
ADORA1-1  PSCHKPSILTYIAIFLTHGNSAMNPVYAFRIQKFRVTFLKIWNDFRCQPAPPIDEDLPEERPDD
Adora1-1  PTCQKPSILIIYIAIFLTHGNSAMNPVYAFRIHKFRVTFLKIWNDFRCQPKPPIEEDIPEEKADD
Consensus PScqKPSILiYIAIFLTHGNSAMNPVYAFRIqKFRVTFLKIWNDFRCQPAPPI#EDiPEERaDD
```
